# Supplementary material for: A Thermodynamic Perspective on Potential G‐Quadruplex Structures as Silencer Elements in the MYC Promoter
Source: PubMed Central journal article supplement (PMC7839732; doi:10.1002/chem.202002985), 2020-11-19
Supplement: CHEM-26-17242-s001.pdf [file CHEM-26-17242-s001.pdf]

# Chemistry–A European Journal

Supporting Information

## **A Thermodynamic Perspective on Potential G-Quadruplex Structures as Silencer Elements in the MYC Promoter**

Jagannath Jana and Klaus Weisz\*<sup>[a]</sup>

## **Author Contributions**

J.J. Formal analysis: Equal; Investigation: Lead; Methodology: Equal; Validation: Equal; Writing - Original Draft: Equal; Writing - Review & Editing: Equal

K.W. Conceptualization: Lead; Formal analysis: Equal; Funding acquisition: Lead; Methodology: Equal; Resources: Lead; Supervision: Lead; Validation: Equal; Writing - Original Draft: Equal; Writing - Review & Editing: Equal.

## Supporting Information

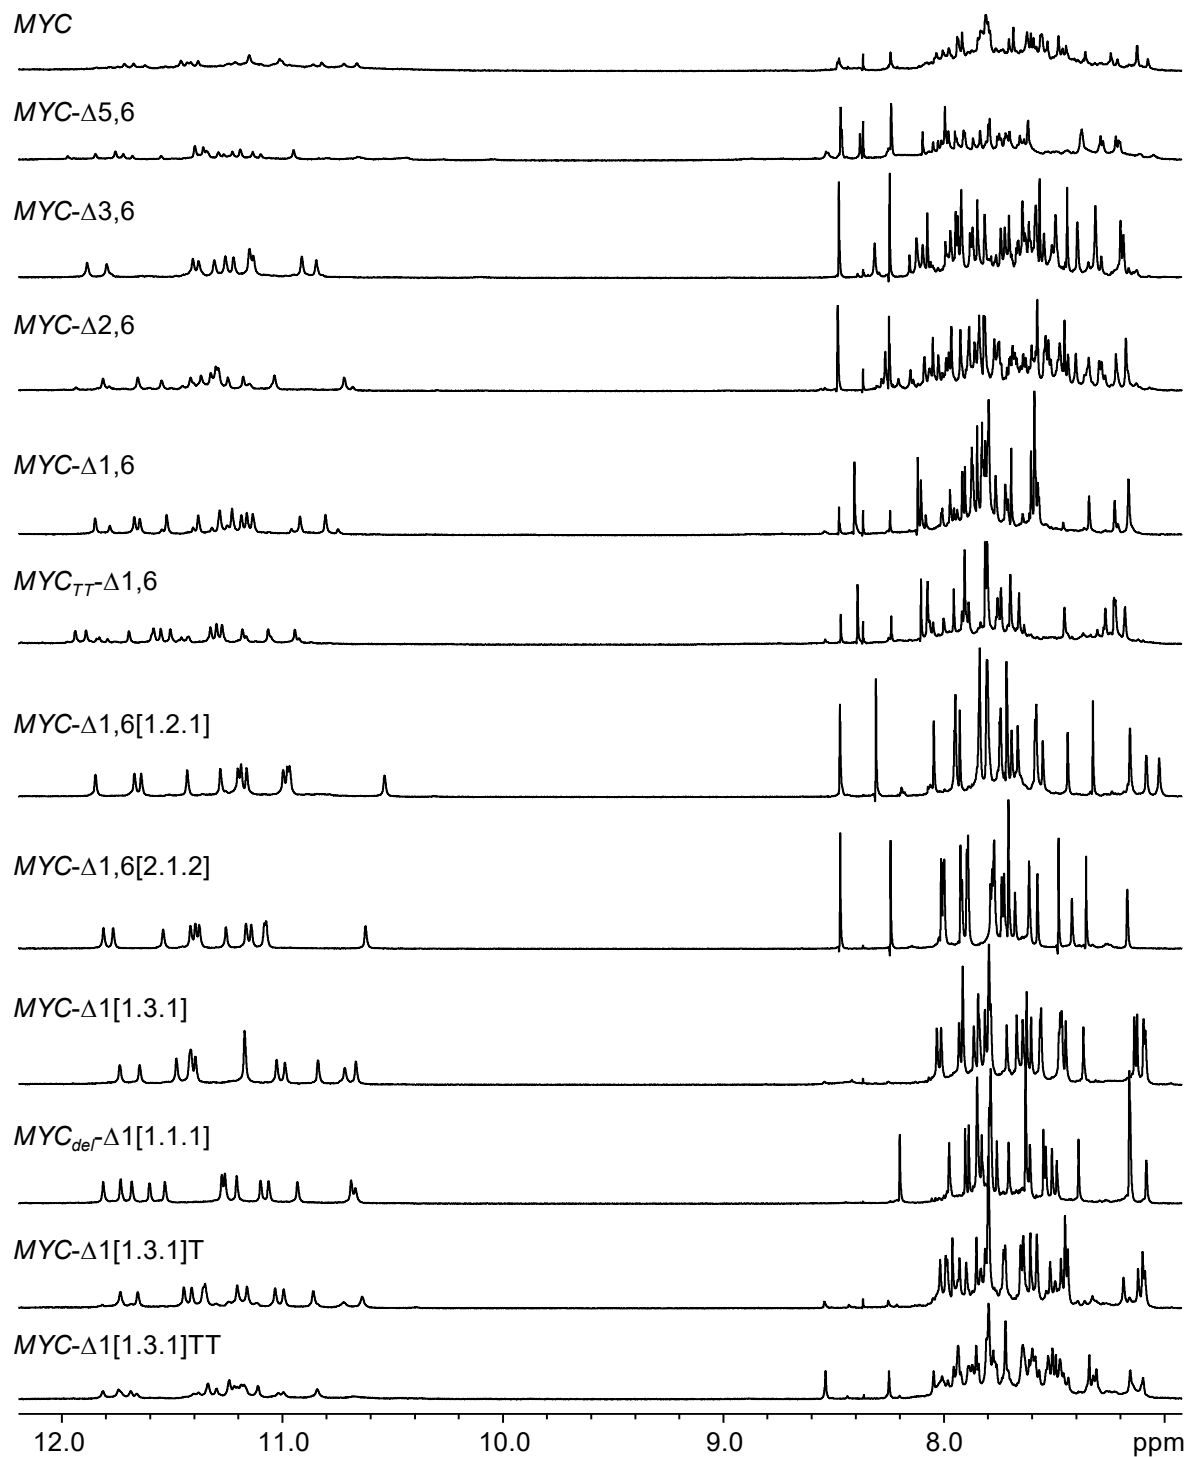

**Figure S1.** Imino and aromatic proton NMR spectral region of *MYC* sequence variants (0.2 mM) at 298 K in 10 mM potassium phosphate buffer, pH 7.

### Gel electrophoresis

For non-denaturing polyacrylamide gel electrophoresis, annealed oligonucleotide samples (200 pmol in 10  $\mu$ L per lane) were loaded onto a 15% polyacrylamide gel (acrylamide:bis-acrylamide 19:1). Separation was performed at room temperature in TBE buffer supplemented with 10mM KCl using a voltage of 80 V. Bands were visualized by staining with a 50  $\mu$ M thiazole orange solution.

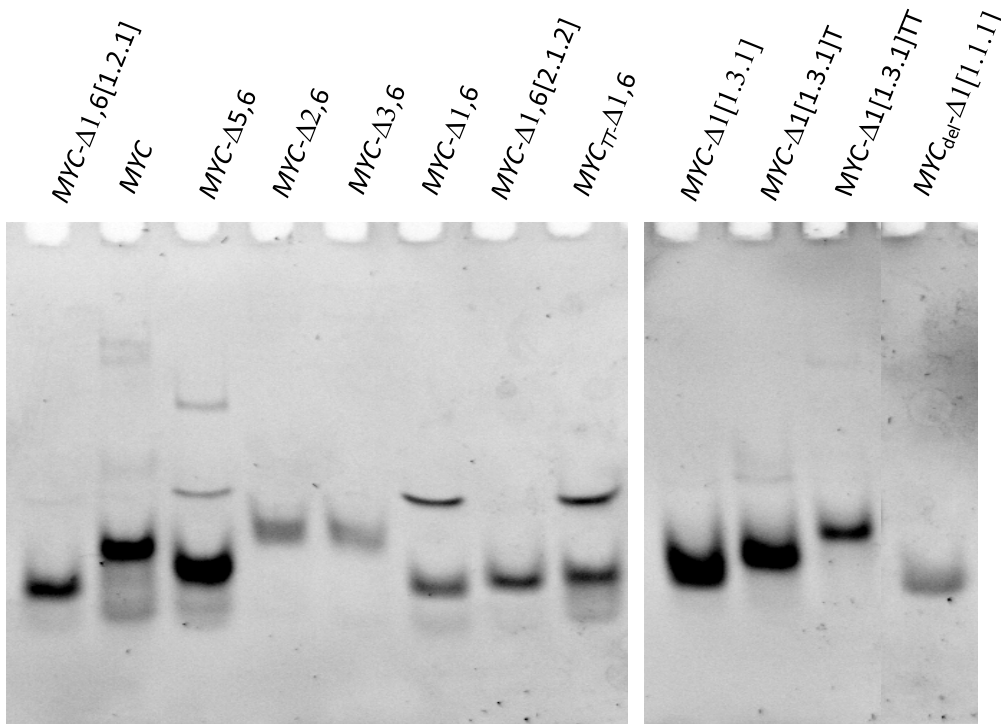

**Figure S2.** Non-denaturing polyacrylamide gel electrophoresis of *MYC* sequences after annealing in 10 mM potassium phosphate buffer, pH 7.

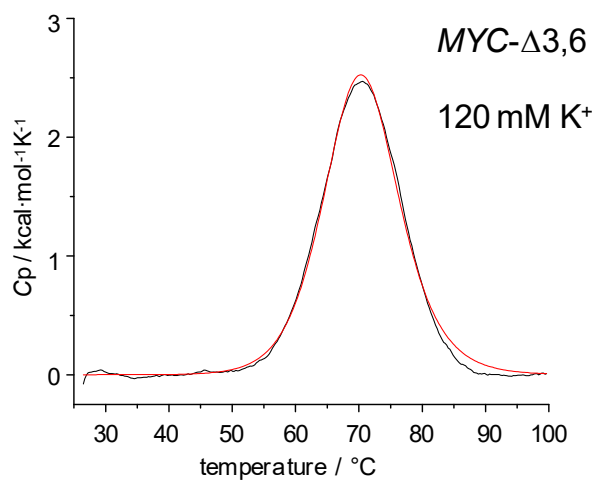

**Figure S3.** DSC thermogram for melting of *MYC*- $\Delta$ 3,6 in 20 mM potassium phosphate, 100 mM KCl, pH 7. Fitted curve based on a non-two-state model with  $\Delta H_{\text{cal}}^{\circ} \neq \Delta H_{\text{vH}}^{\circ}$  is shown in red.

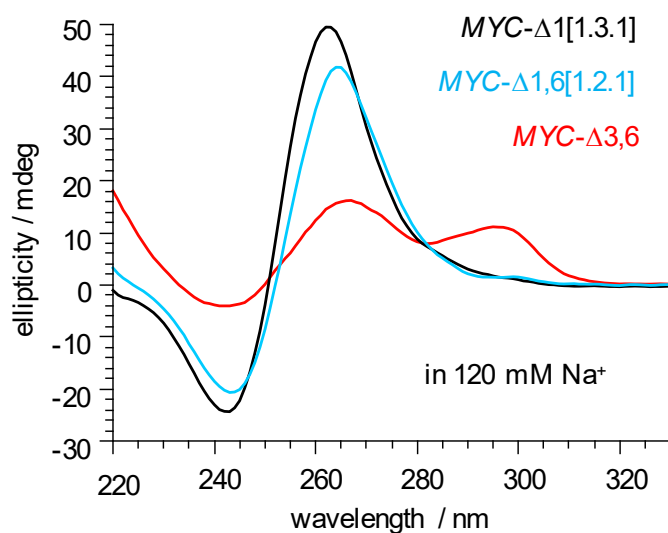

**Figure S4.** CD spectra of *MYC* sequence variants (5  $\mu$ M) at 293 K in 20 mM sodium phosphate, 100 mM NaCl, pH 7.
